# Supplementary material for: Failure of Working Memory Training to Enhance Cognition or Intelligence
Source: PLOS journal article supplement (doi:10.1371/journal.pone.0063614), 2013-05-22

### Dual n-back Training Gain

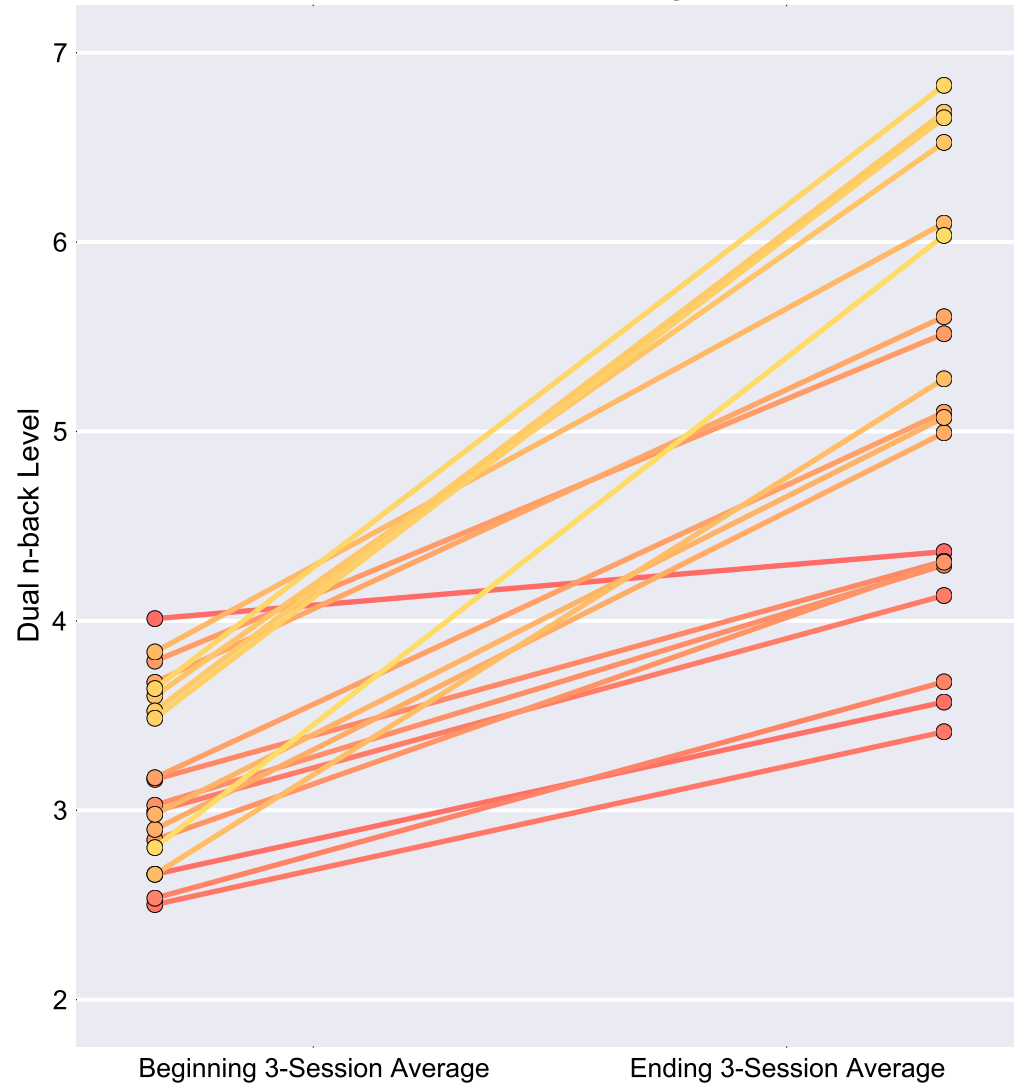

### MOT Training Gain

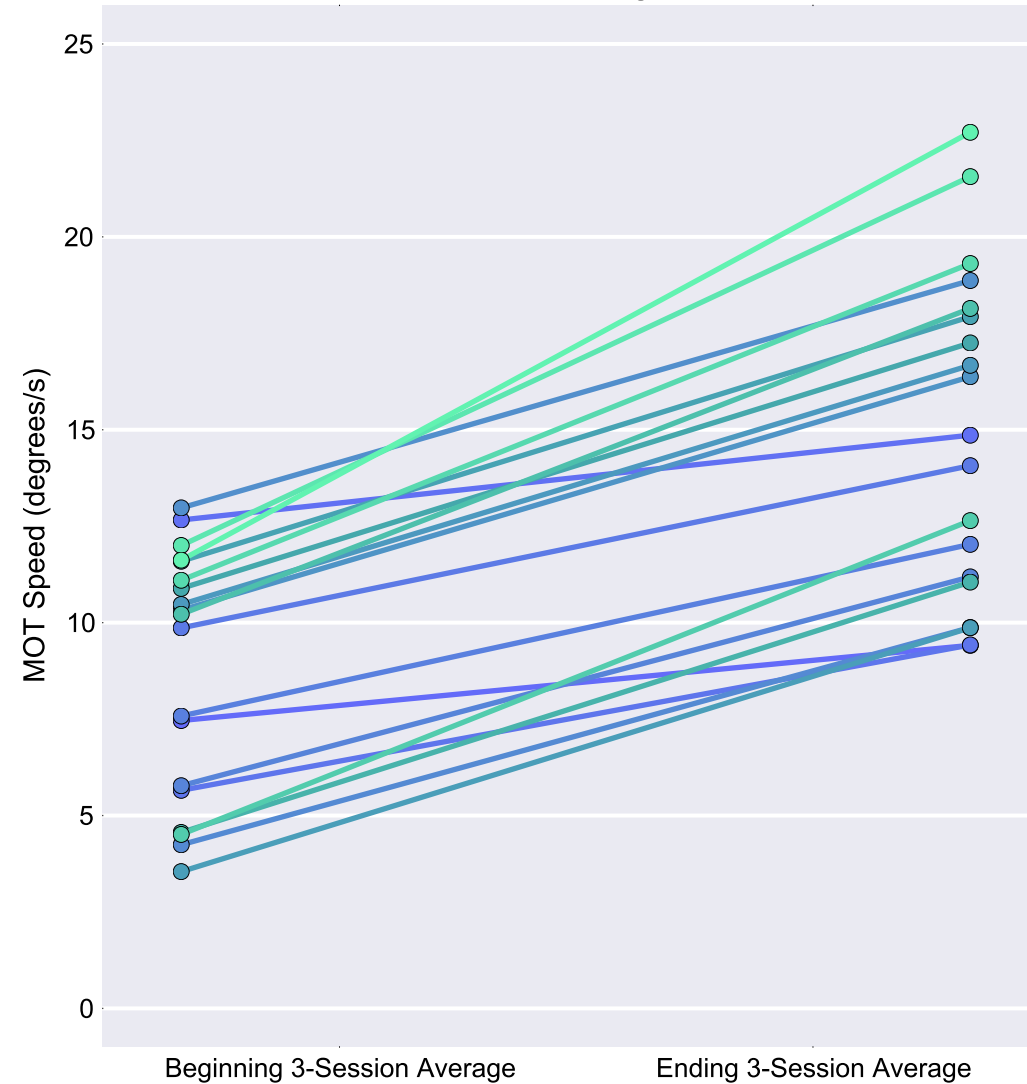

Supplement: S1 (10.1371/journal.pone.0063614.s001) [file journal.pone.0063614.s001.pdf › journal.pone.0063614.s001.pdf]
