# Supplementary material for: Failure of Working Memory Training to Enhance Cognition or Intelligence
Source: PLOS journal article supplement (doi:10.1371/journal.pone.0063614), 2013-05-22

**A**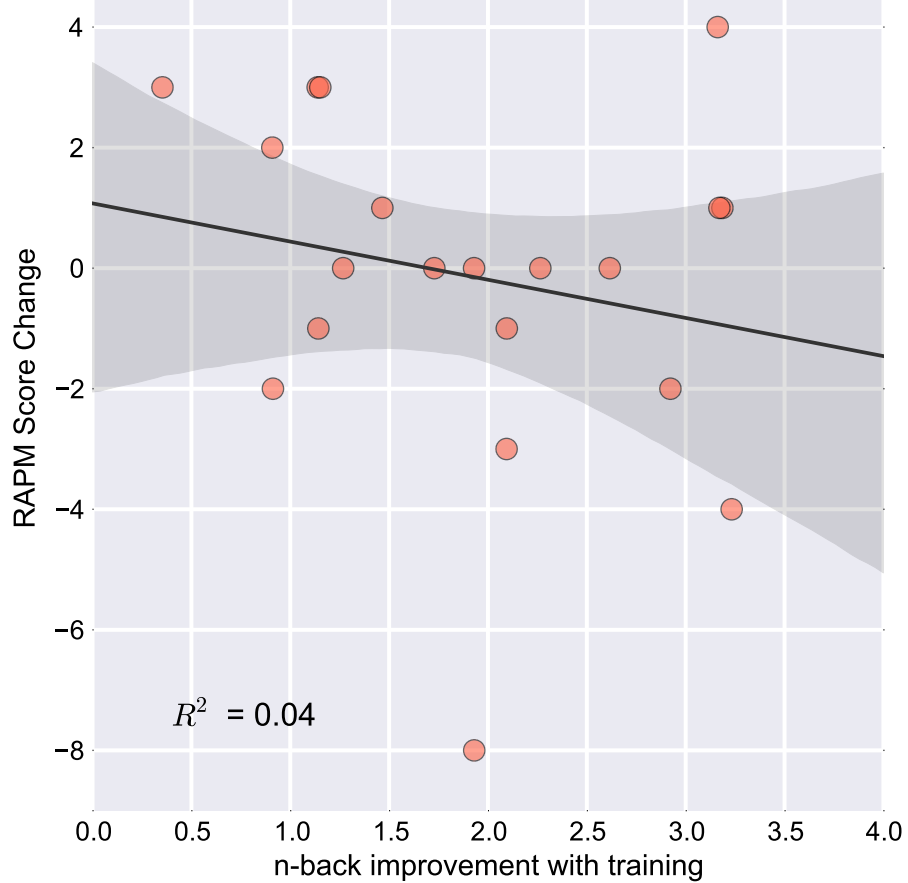**B**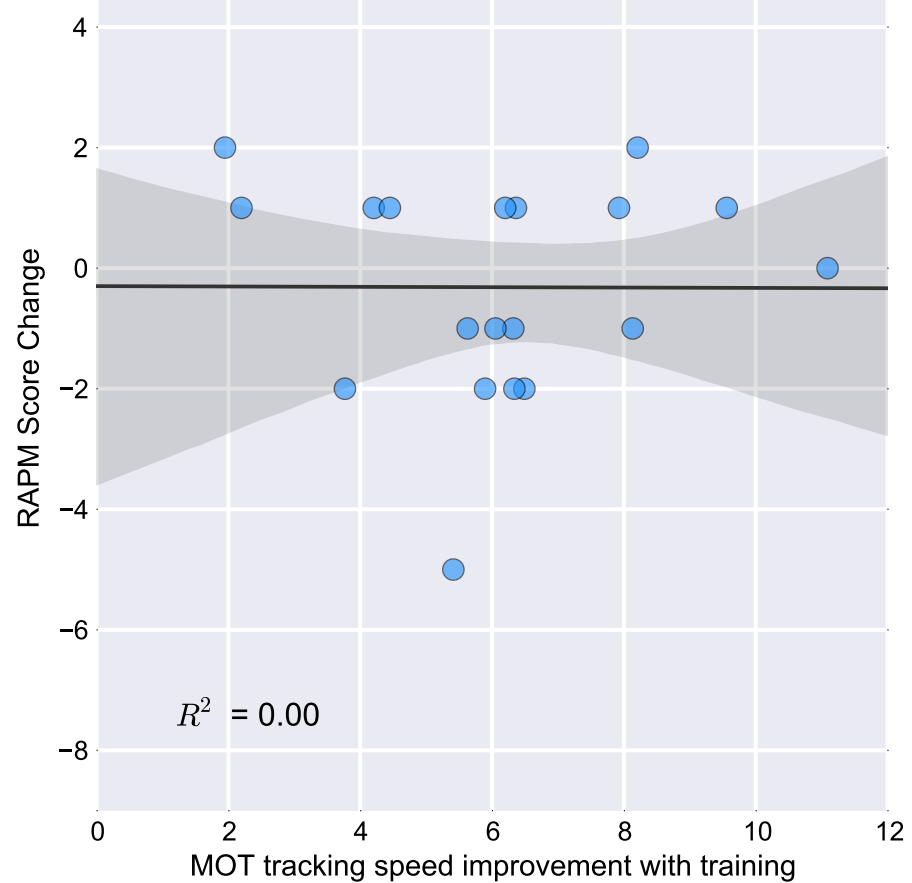**C**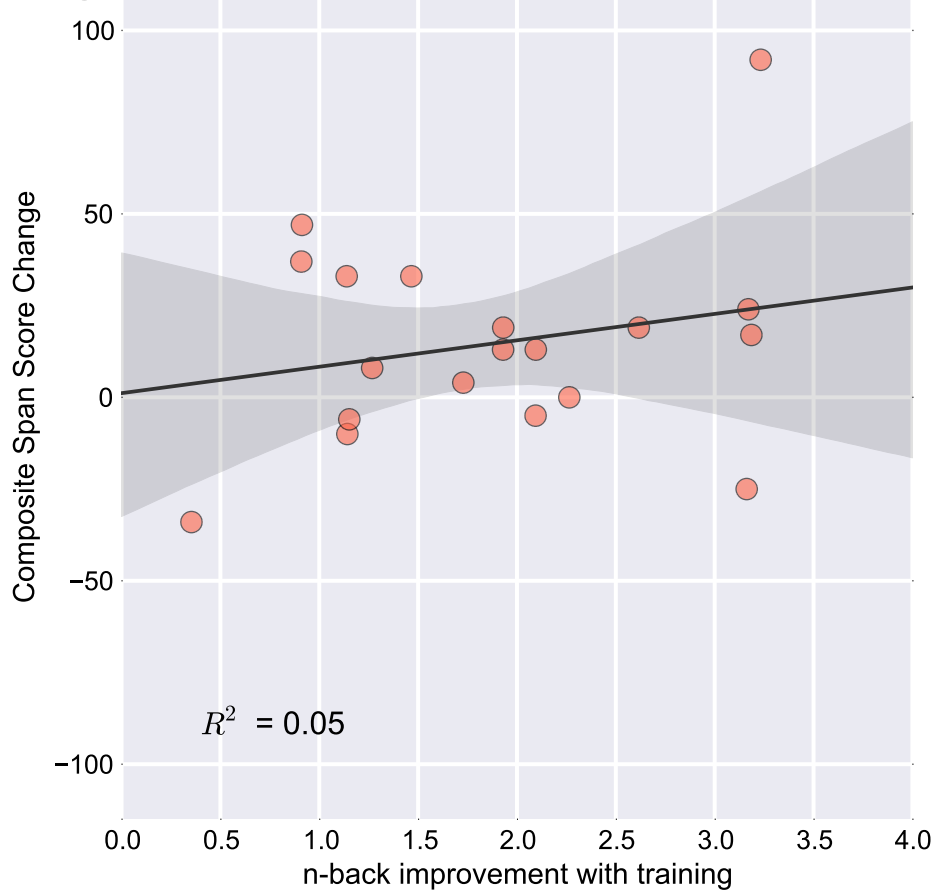**D**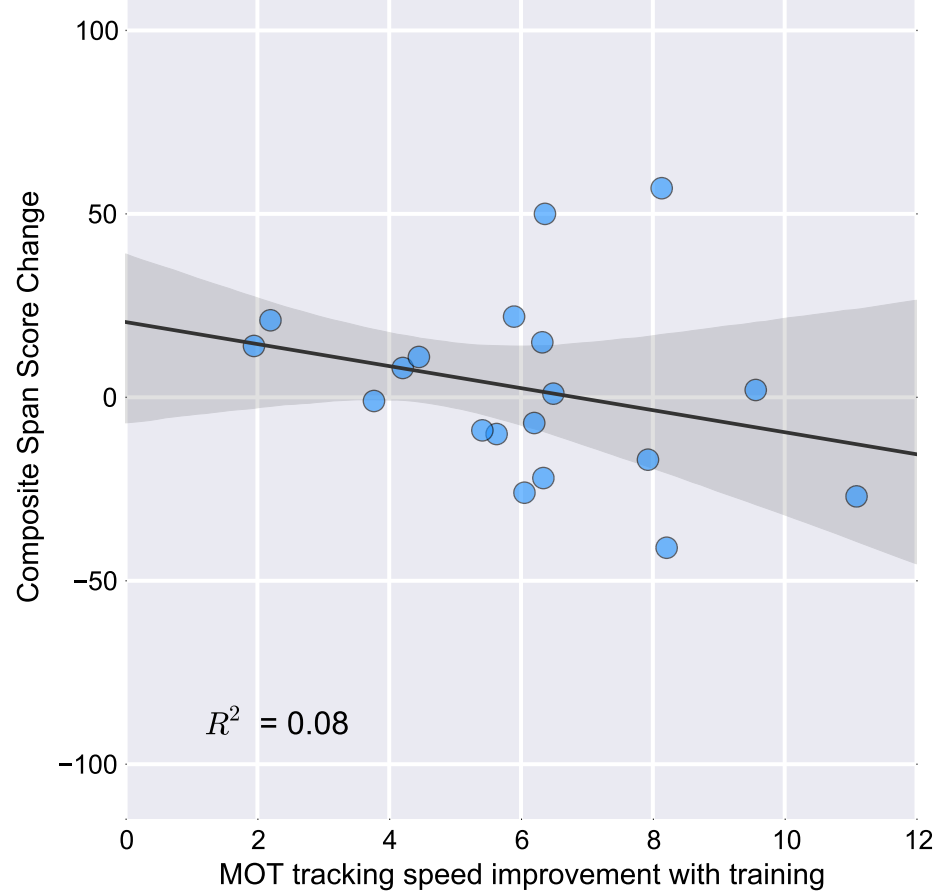

Supplement: S2 (10.1371/journal.pone.0063614.s002) [file journal.pone.0063614.s002.pdf › journal.pone.0063614.s002.pdf]
